# Supplementary material for: Sensitive immunoenzyme assay for the detection of antibiotic flumequine in honey
Source: Royal Society of Chemistry journal article supplement (doi:10.1039/d3ay01714a), 2023-12-11
Supplement: d3ay01714a1.pdf [file d3ay01714a1.pdf]

## Sensitive immunoenzyme assay for the detection of antibiotic flumequine in honey

Olga D. Hendrickson, Anatoly V. Zherdev, and Boris B. Dzantiev\*

A.N. Bach Institute of Biochemistry, Research Center of Biotechnology of the Russian Academy of Sciences, Leninsky prospect 33, 119071, Moscow, Russia.

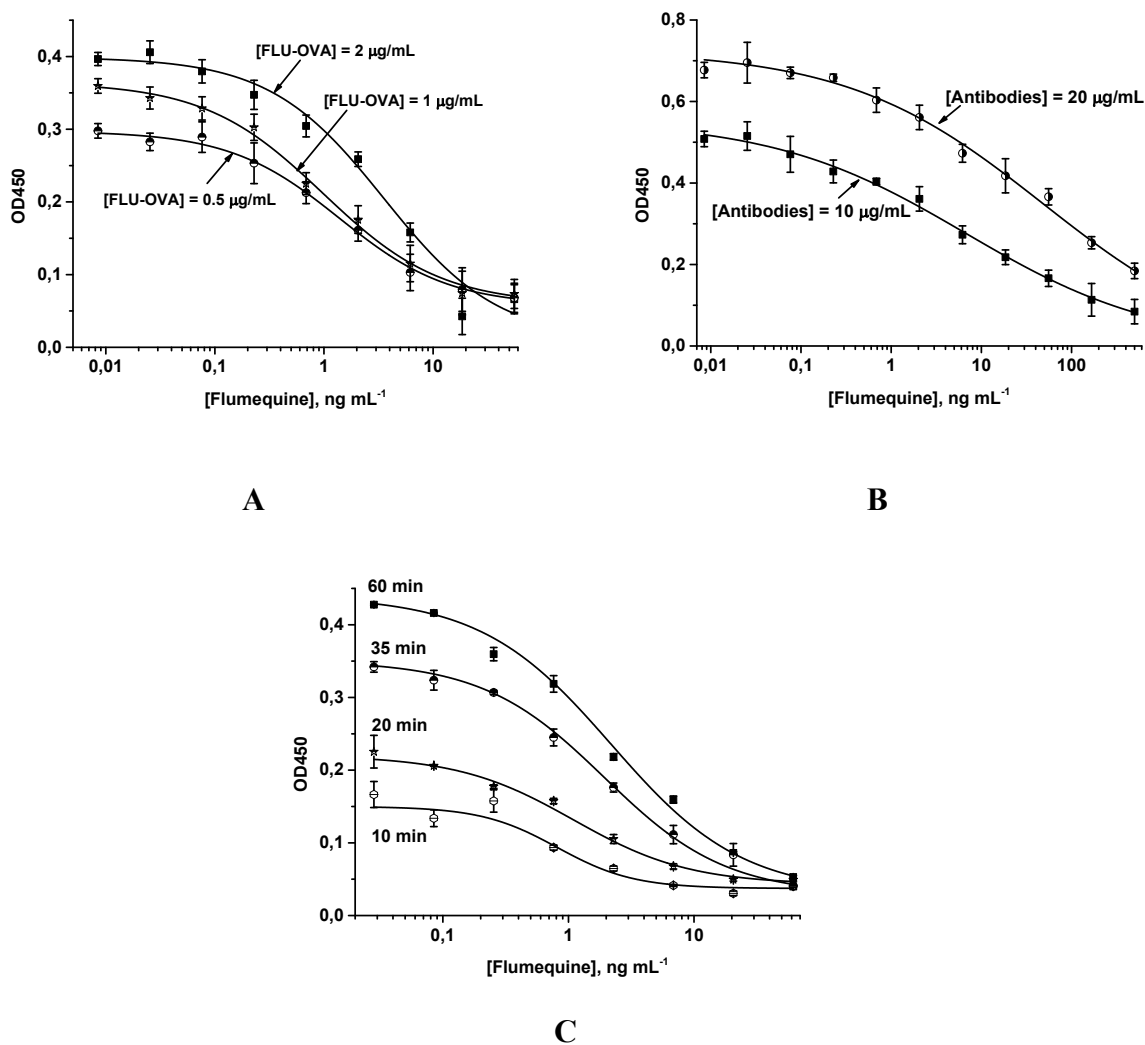

Fig. S1. Optimization of the EIA of FLU: selection of the concentration of the immobilized FLU-OVA (A), concentration of anti-FLU antibodies (B), and the duration of the competitive stage (C).

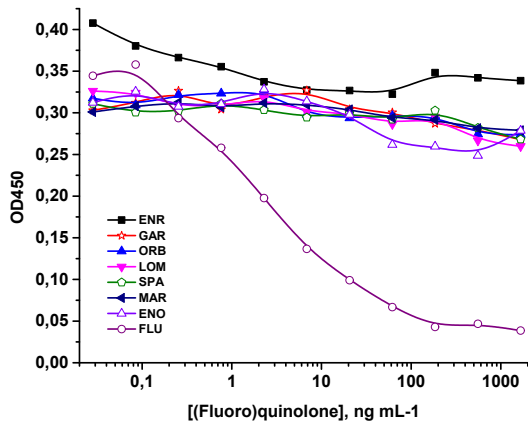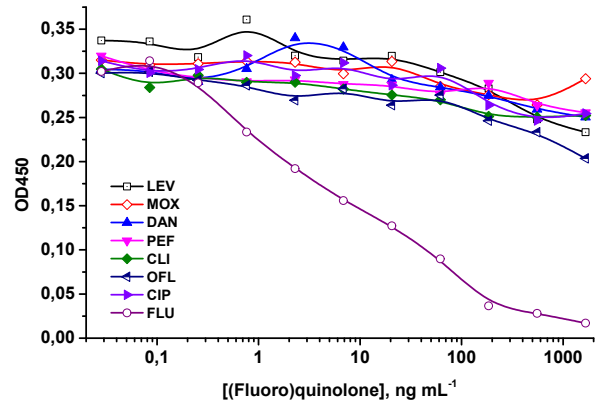

A

B

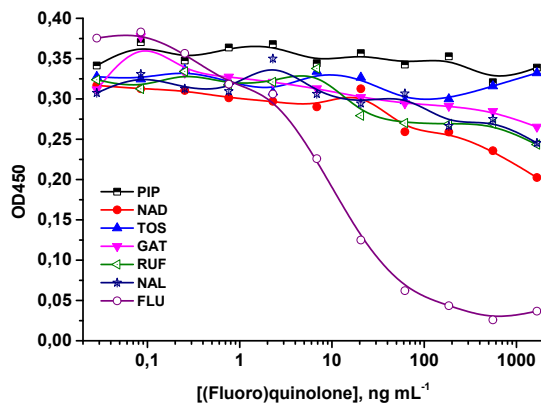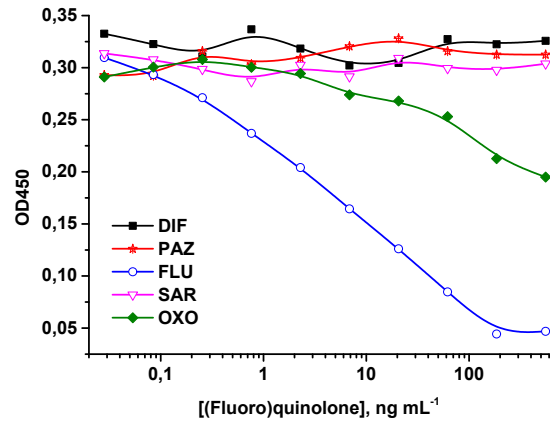

C

D

Fig. S2 Calibration curves obtained in the ELISA of FLU and its structural analogs: ENR, GAR, ORB, LOM, SPA, MAR, ENO (A), LEV, MOX, DAN, PEF, CLI, OFL, CIP (B), PIP, NAD, TOS, GAT, RUF, NAL (C), DIF, PAZ, SAR, and OXO (C).
